# Supplementary material for: Poly(ionic liquid)s with Dicationic Pendants as Gas Separation Membranes
Source: MDPI journal article supplement (doi:10.3390/membranes12030264), 2022-02-25
Supplement: s1 [file s1]

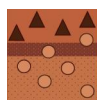

*Supplementary Materials:*

# Poly(Ionic Liquid)s with Dicationic Pendants as Gas Separation Membranes

Sudhir Ravula <sup>1</sup>, Kathryn E. O'Harra <sup>1</sup>, Keith A. Watson <sup>2</sup> and Jason E. Bara <sup>1,\*</sup>

<sup>1</sup> Department of Chemical & Biological Engineering, University of Alabama, Tuscaloosa, AL 35487, USA; sravula@ua.edu (S.R.); keoharra@ua.edu (K.E.O.)

<sup>2</sup> Department of Chemistry & Biochemistry, University of Alabama, Tuscaloosa, AL 35487, USA; kawatson3@crimson.ua.edu

\* Correspondence: jbara@eng.ua.edu (J.E.B)

The supporting data referenced in the manuscript: "Poly(Ionic Liquid)s with Dicationic Pendants as Gas Separation Membranes". Structures, NMR (<sup>1</sup>H and <sup>13</sup>C), optimization conditions and gas separation properties (diffusivity and solubility) results are shown in the following sections.

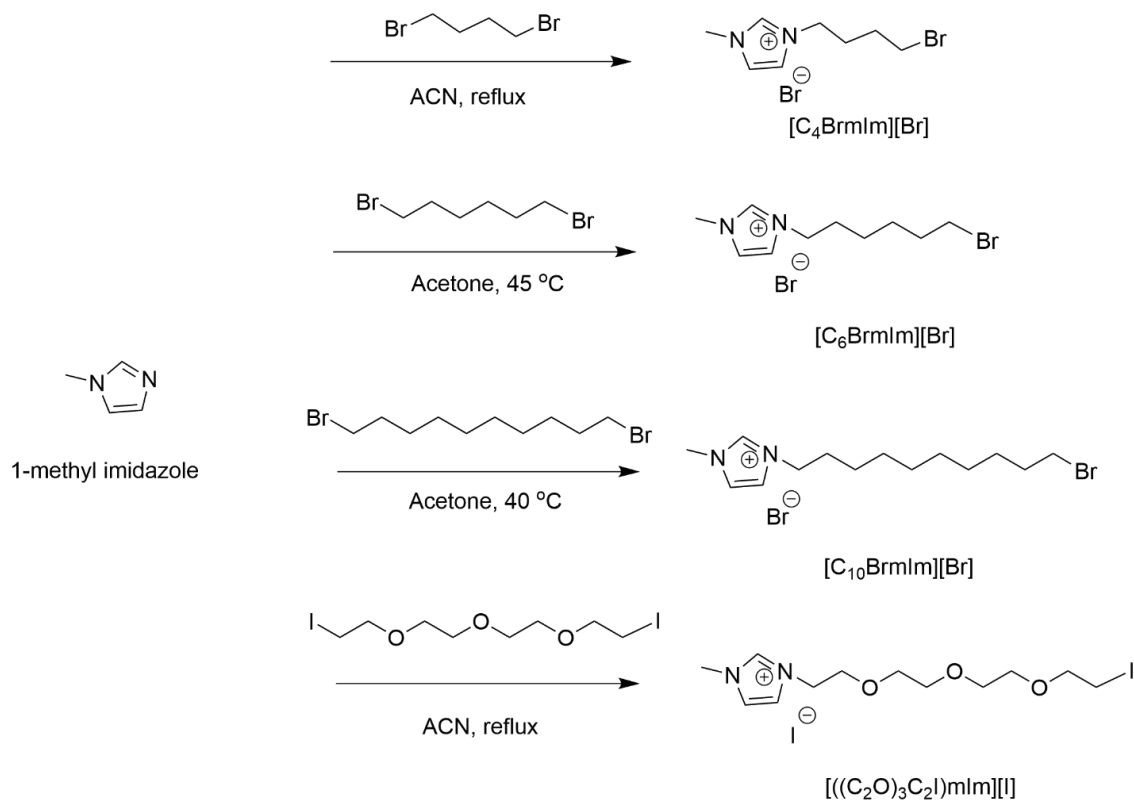

**Figure S1.** Synthesis of intermediates 3-(4-bromo(iodo)alkyl)-1-methyl-1*H*-imidazol-3-ium bromide (iodide) salts and their corresponding <sup>1</sup>H NMR spectra were shown below.

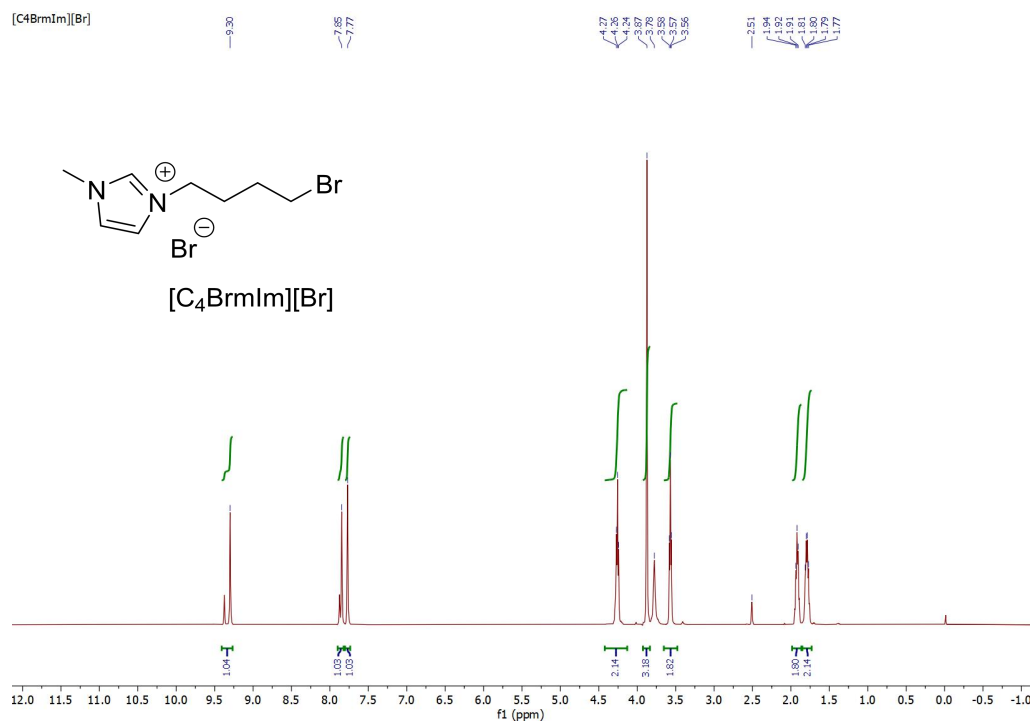

**Figure S2.** <sup>1</sup>H NMR spectrum for [C<sub>4</sub>BrmIm]Br.

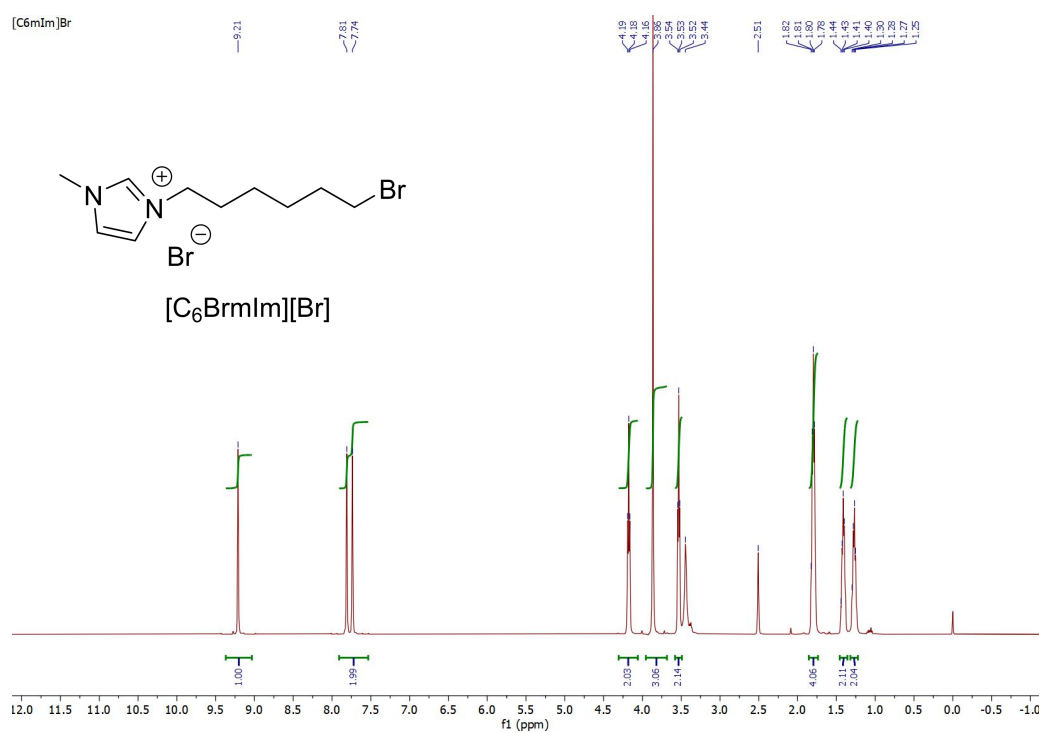

Figure S3. <sup>1</sup>H NMR spectrum for [C<sub>6</sub>BrmIm]Br.

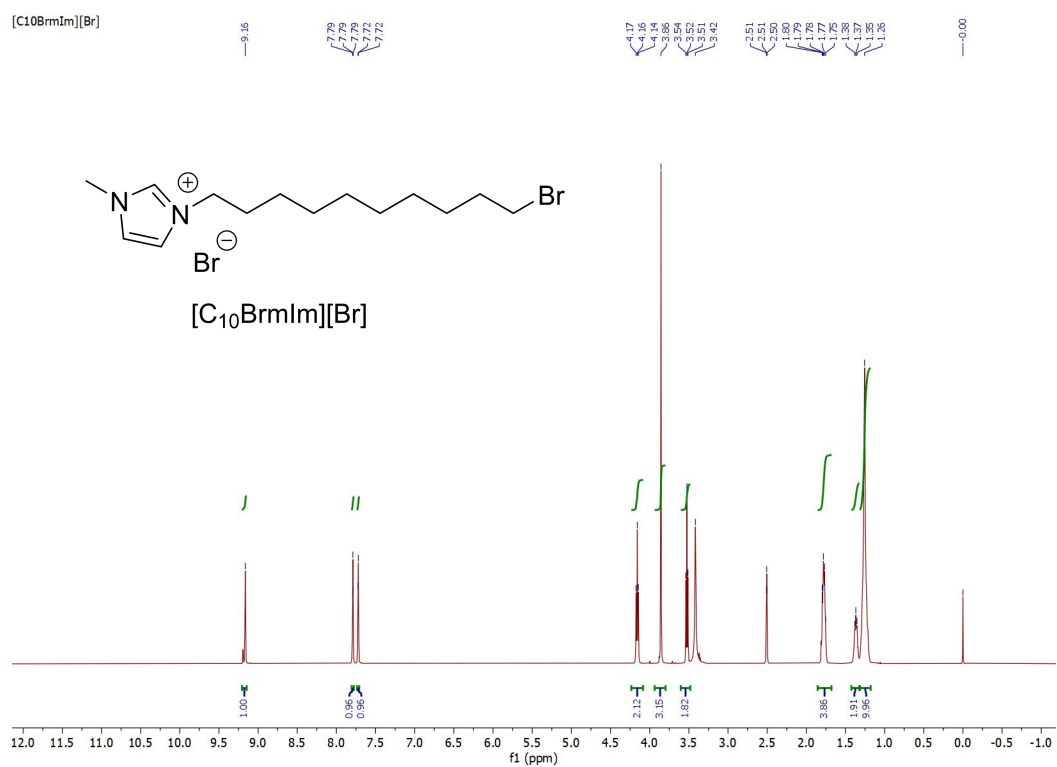

Figure S4. <sup>1</sup>H NMR spectrum for [C<sub>10</sub>BrmIm]Br.

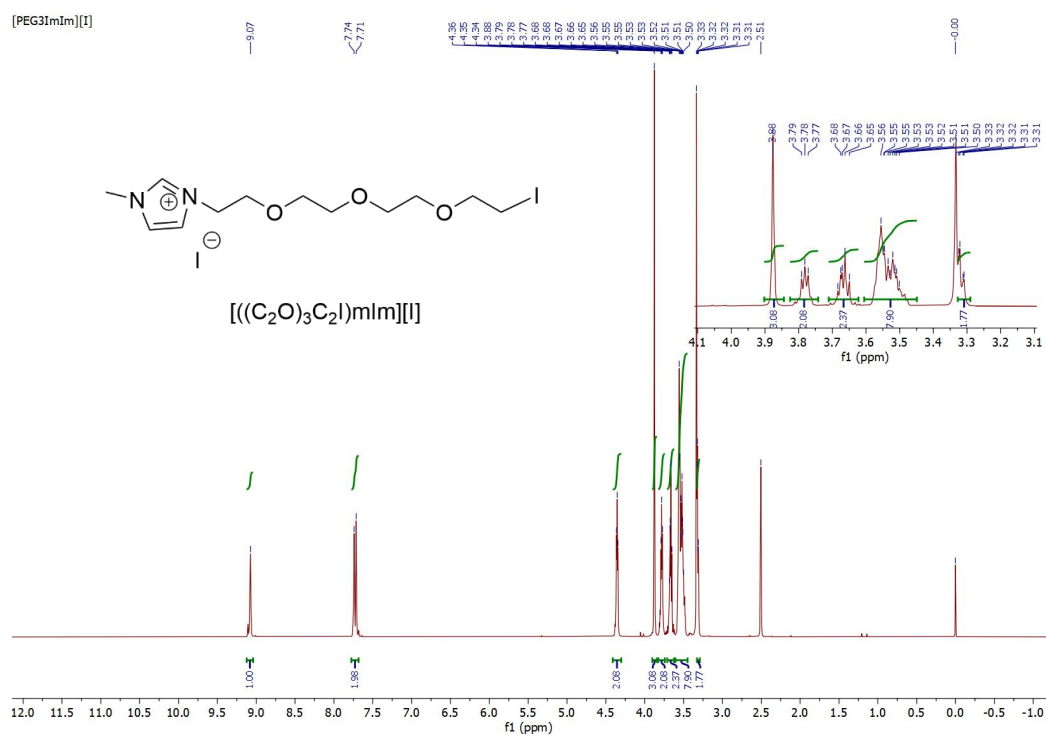

**Figure S5.**  $^1H$  NMR spectrum for  $[(C_2O)_3C_2I]mIm][I]$ . Inset image shows the proton region from 3.1 to 4.1 ppm.

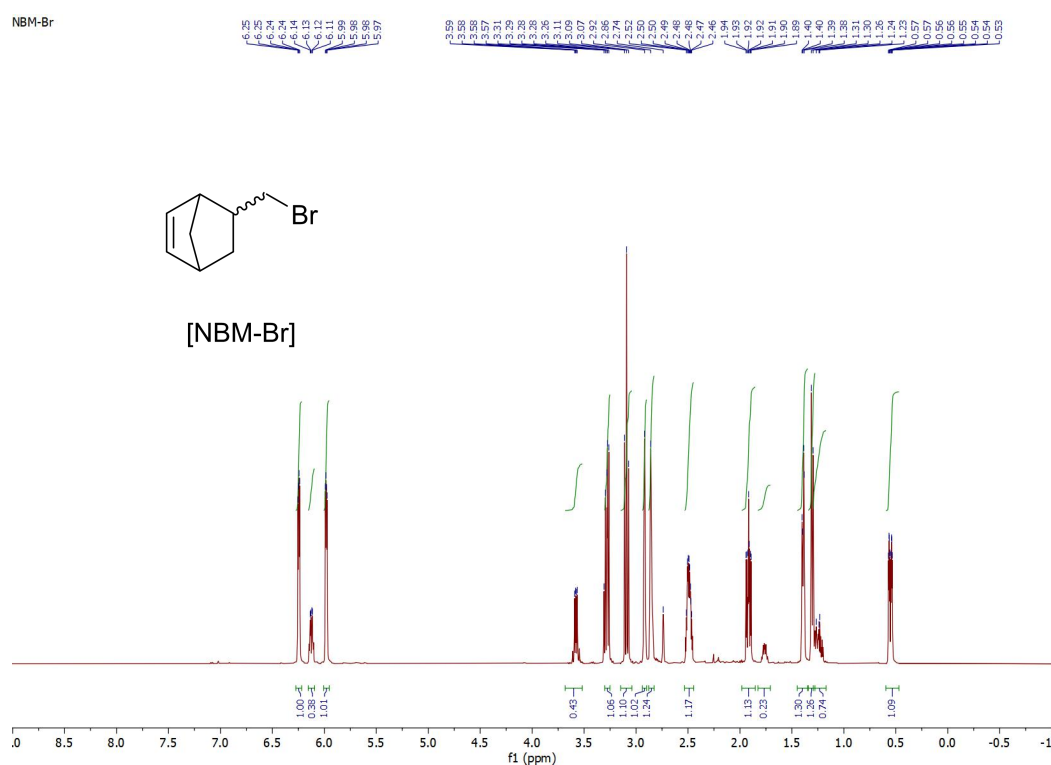

**Figure S6.**  $^1H$  NMR spectrum for [NBM-Br].

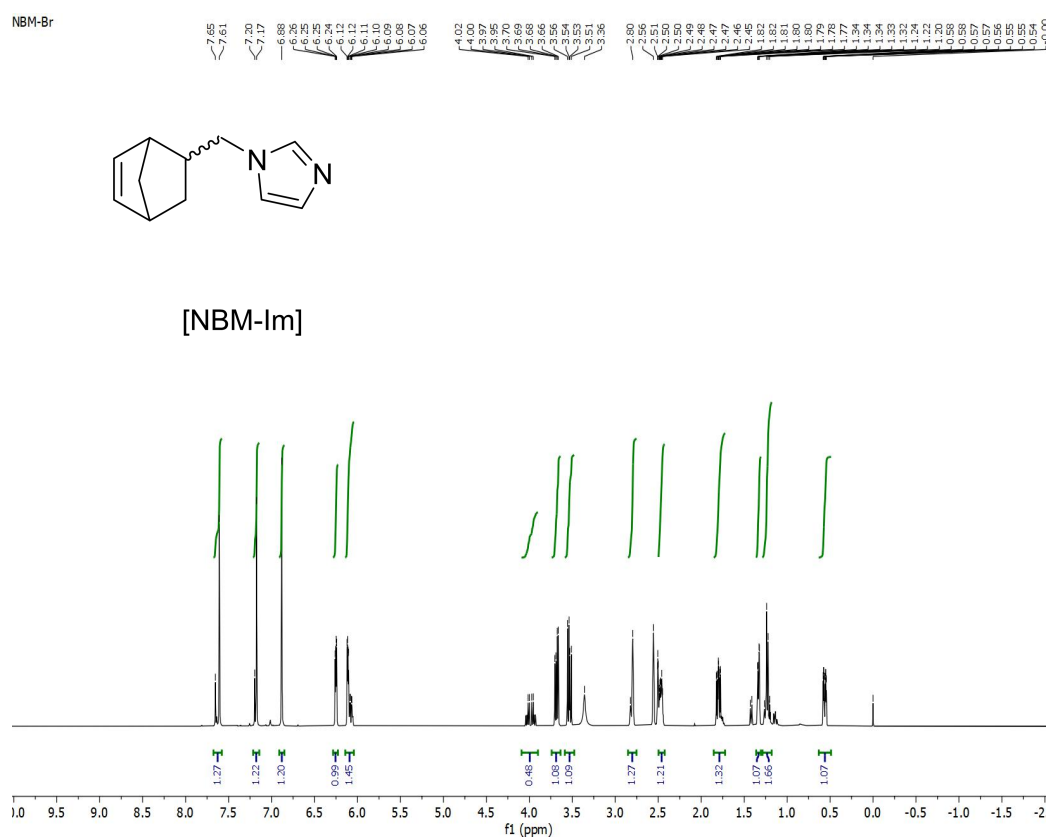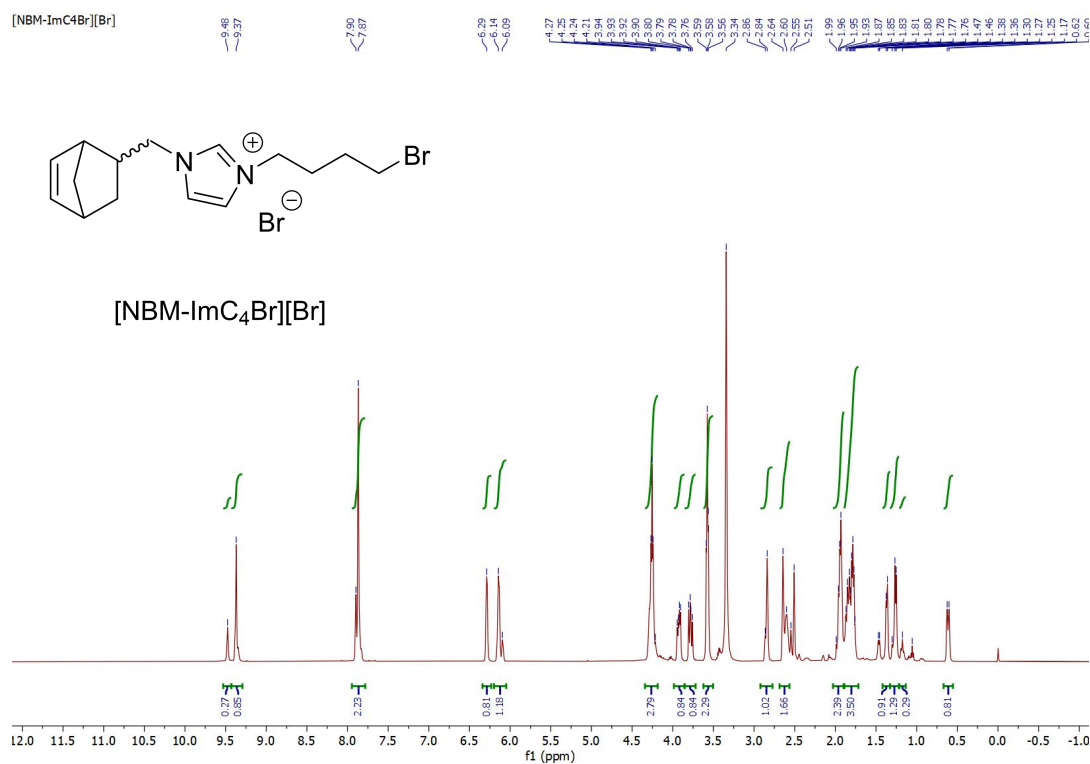

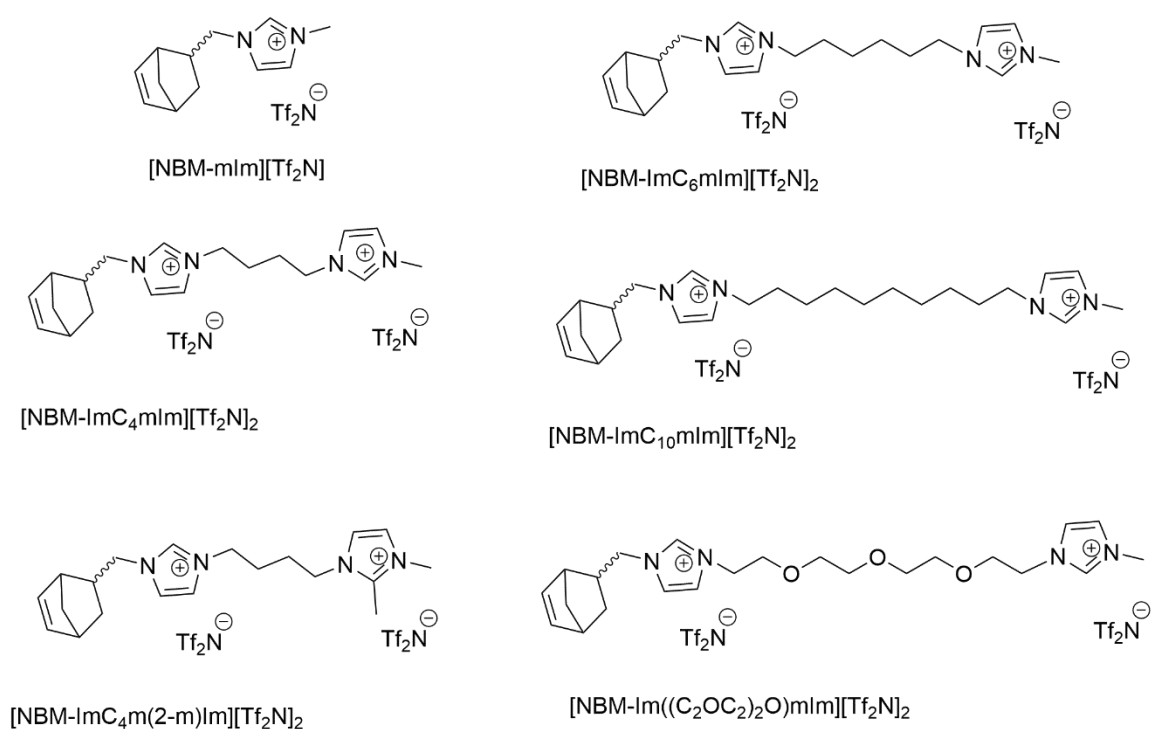

**Figure S9.** Structures for six norbornenyl-containing imidazolium-based mono- and dicationic ILs studied in this work.

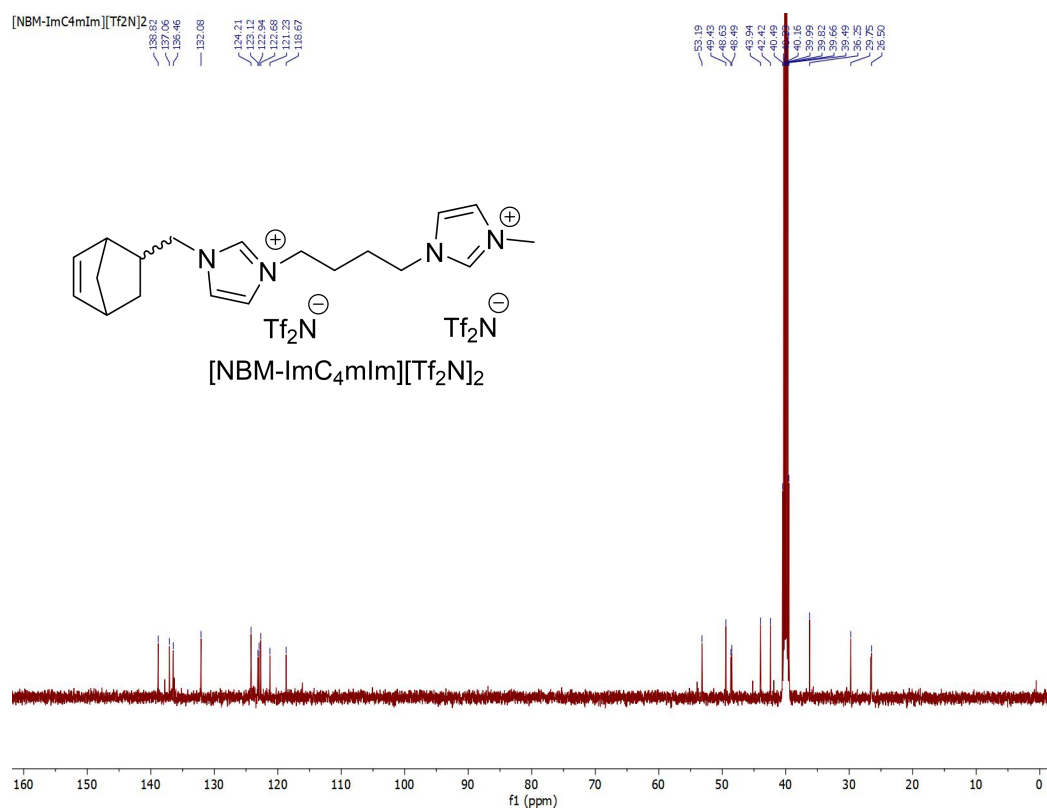

**Figure S10.** <sup>13</sup>C NMR spectrum for [NBM-ImC<sub>4</sub>mIm][Tf<sub>2</sub>N]<sub>2</sub>.

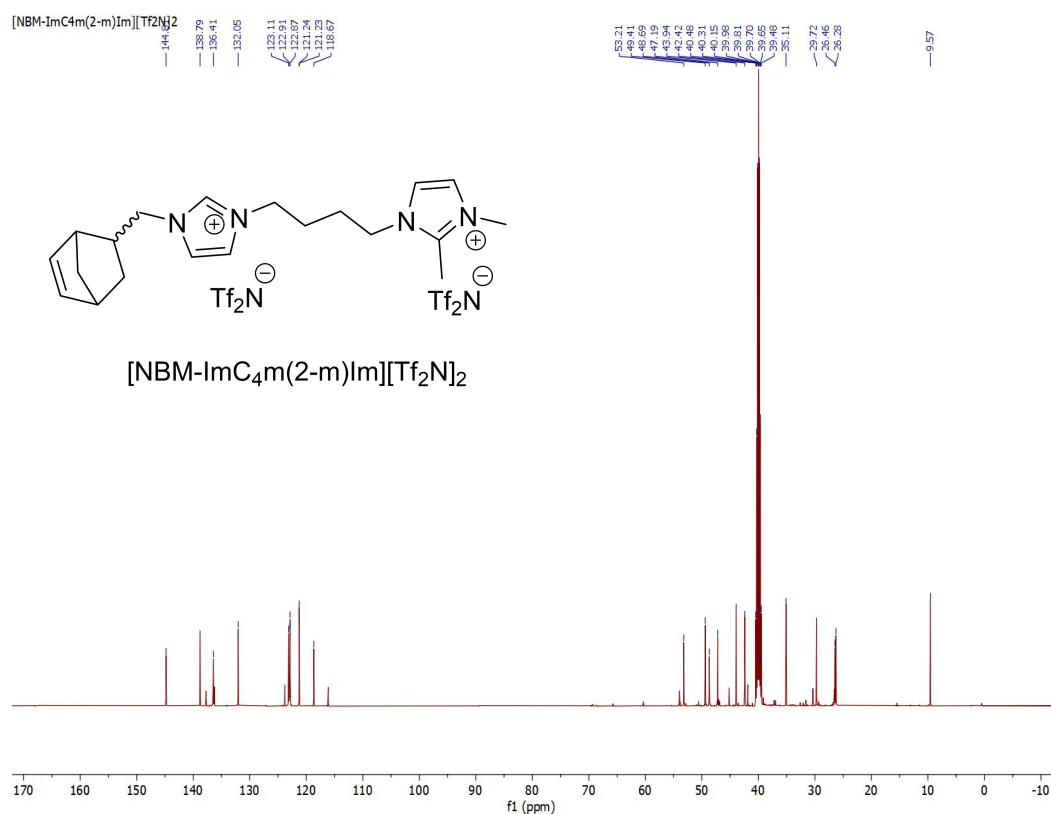

**Figure S11.**  $^{13}C$  NMR spectrum for  $[NBM-ImC_4m(2-m)Im][Tf_2N]_2$ .

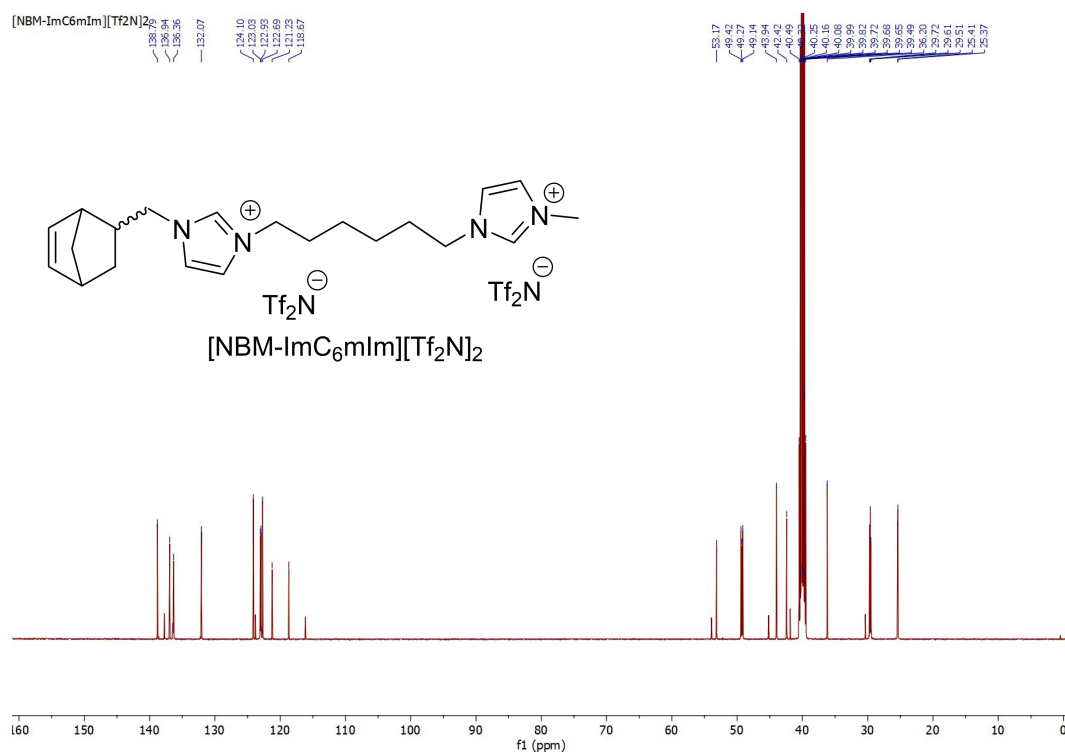

**Figure S12.**  $^{13}C$  NMR spectrum for  $[NBM-ImC_6mIm][Tf_2N]_2$ .

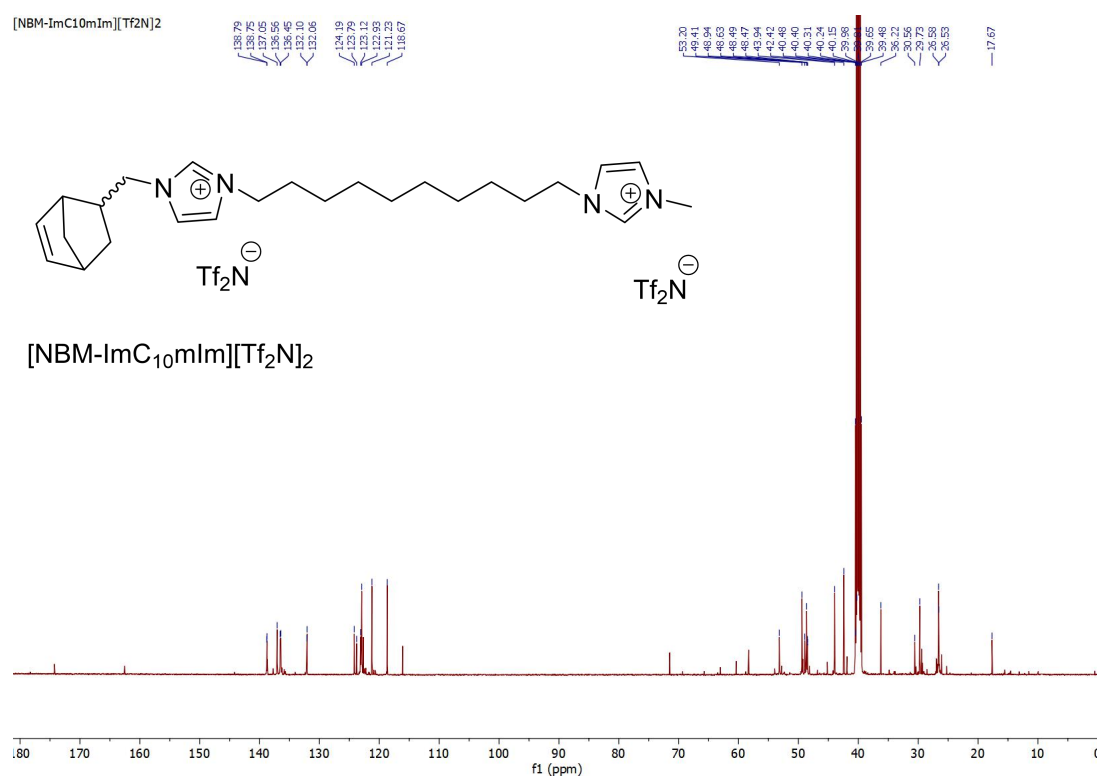

**Figure S13.** <sup>13</sup>C NMR spectrum for [NBM-ImC<sub>10</sub>mIm][Tf<sub>2</sub>N]<sub>2</sub>

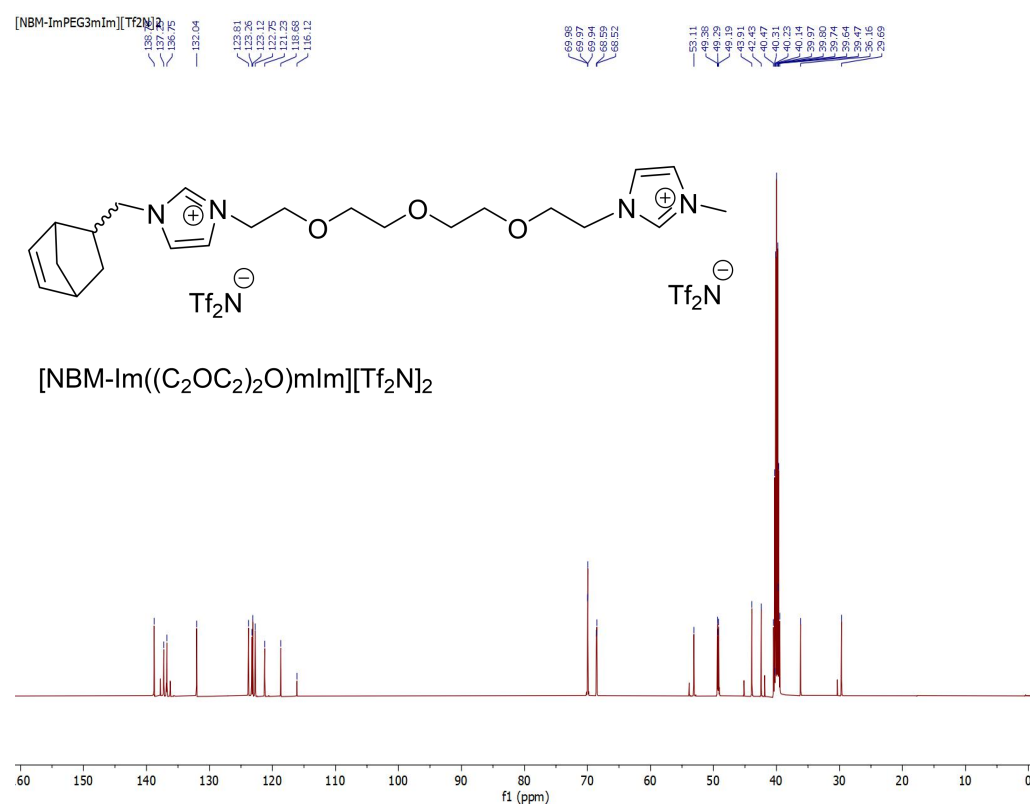

**Figure S14.** <sup>13</sup>C NMR spectrum for [NBM-Im((C<sub>2</sub>OC<sub>2</sub>)<sub>2</sub>O)mIm][Tf<sub>2</sub>N]<sub>2</sub>



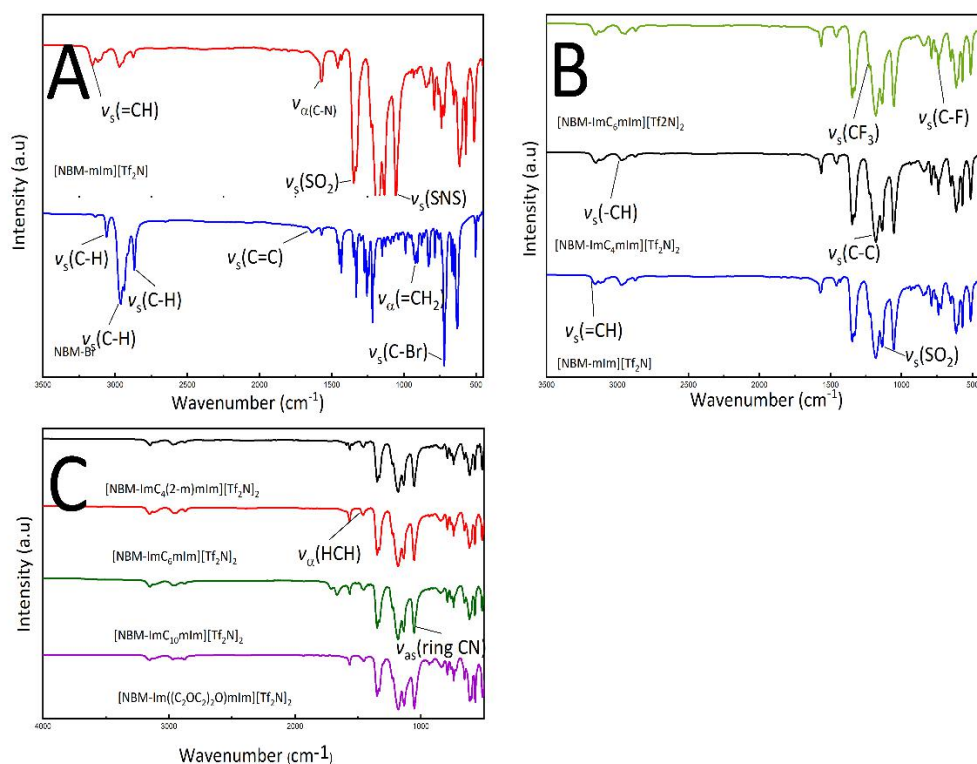

**Figure S15.** FT-IR spectrum for NBM-containing imidazolium-based ILs. (A) FT-IR spectrum for NBM-Br and [NBM-mIm][Tf<sub>2</sub>N] (B) FT-IR spectrum for [NBM-mIm][Tf<sub>2</sub>N], [NBM-ImC<sub>4</sub>mIm][Tf<sub>2</sub>N], and [NBM-ImC<sub>6</sub>mIm][Tf<sub>2</sub>N] (C) FT-IR spectrum for imidazolium-based dicationic IL monomers.

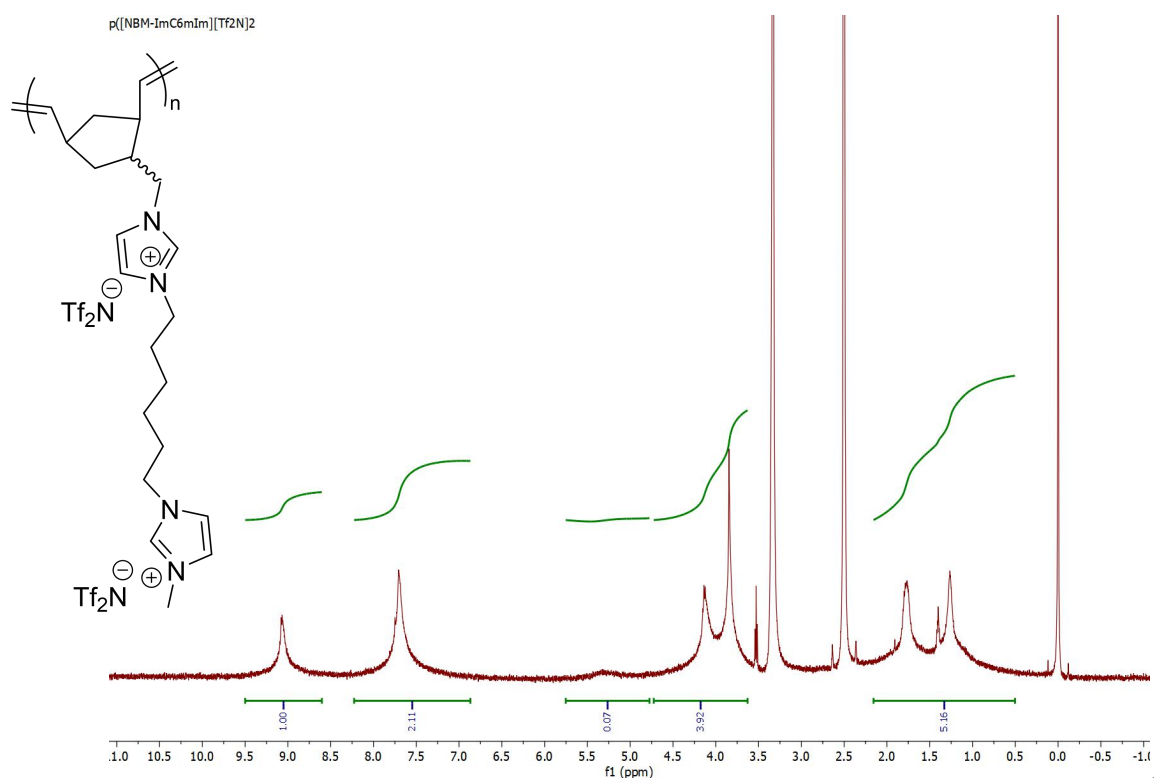

**Figure S16.**  $^1H$  NMR spectrum for  $p([NBM-ImC_6mIm])[Tf_2N]_2$ . Sparingly soluble in  $DMSO-d_6$ .

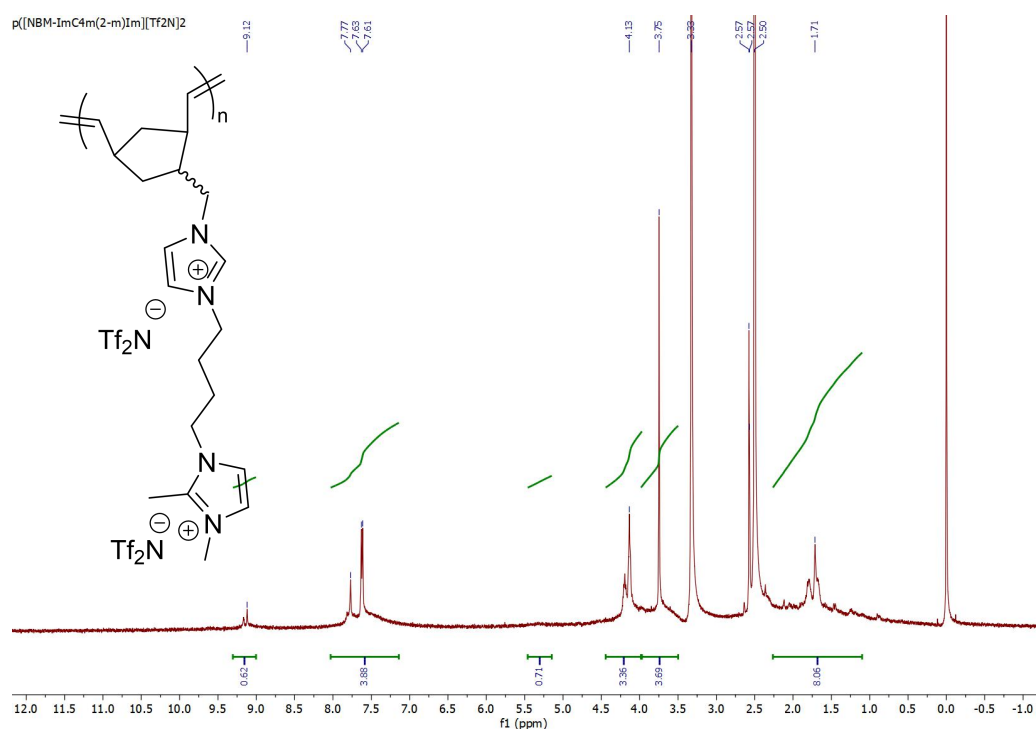

**Figure S17.**  $^1H$  NMR spectrum for  $p([NBM-ImC_4m(2-m)Im])[Tf_2N]_2$ . Sparingly soluble in  $DMSO-d_6$ .

**Table S1.** Optimizing the reaction conditions for effective polymerization of [NBM-DILs][Tf<sub>2</sub>N]<sub>2</sub>.

| Entry | Monomer                                                                                       | Feed ratio<br>[M]:[G2] | Time        | Temp. (°C) | Solvent       | Polymer<br>Solubility |
|-------|-----------------------------------------------------------------------------------------------|------------------------|-------------|------------|---------------|-----------------------|
| 1     | [NBM-mIm][Tf <sub>2</sub> N]                                                                  | 200:1                  | 4 h         | RT         | DCM           | Soluble               |
| 2     | [NBM-ImC <sub>4</sub> mIm][Tf <sub>2</sub> N]                                                 | 200:1 to<br>1000:1     | 30 min-24 h | RT         | DCM           | Insoluble             |
|       |                                                                                               |                        |             | 20–100     | DMF           | Insoluble             |
|       |                                                                                               |                        |             | 20–100     | DMF/DCM (2:1) | Insoluble             |
|       |                                                                                               |                        |             | 20–70      | THF           | Insoluble             |
| 3     | [NBM-ImC <sub>6</sub> mIm][Tf <sub>2</sub> N] <sub>2</sub>                                    | 200:1 to<br>1000:1     | 30 min-24 h | RT         | DCM           | Insoluble             |
| 4     | [NBM-ImC <sub>10</sub> mIm][Tf <sub>2</sub> N] <sub>2</sub>                                   |                        | 30 min-24 h | RT         | DCM           | Insoluble             |
| 5     | [NBM-Im((C <sub>2</sub> OC <sub>2</sub> ) <sub>2</sub> O)mIm][Tf <sub>2</sub> N] <sub>2</sub> |                        | 30 min-24 h | RT         | DCM           | Insoluble             |

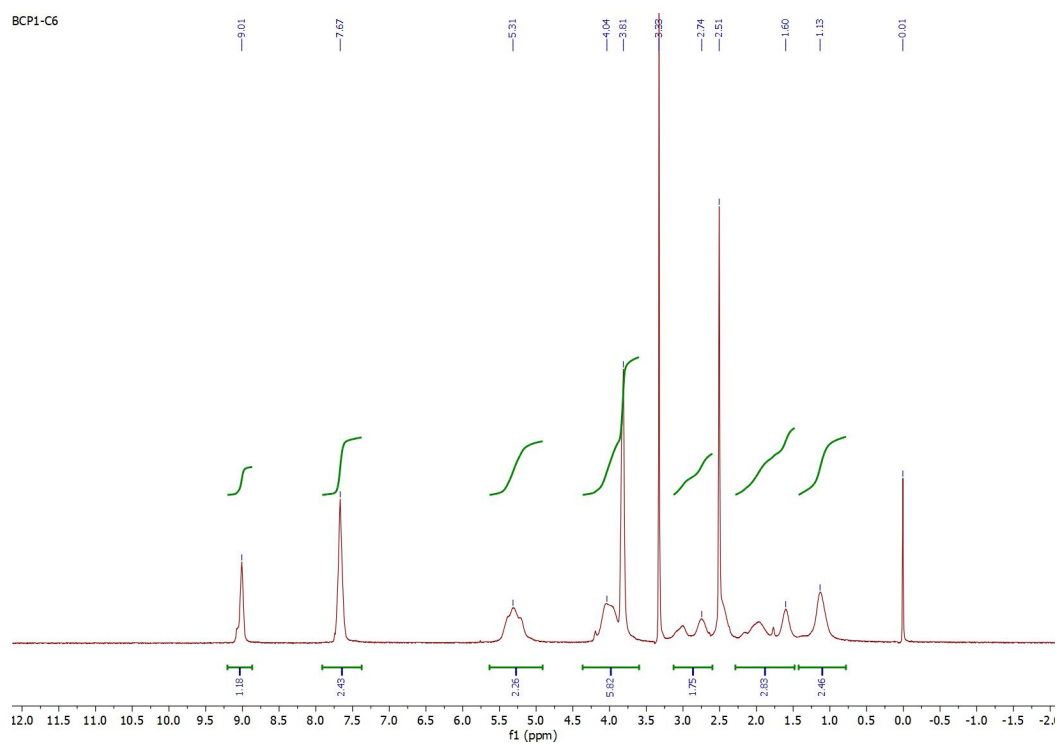

Figure S18.  $^1\text{H}$  NMR spectrum for BCP1-C<sub>6</sub>.

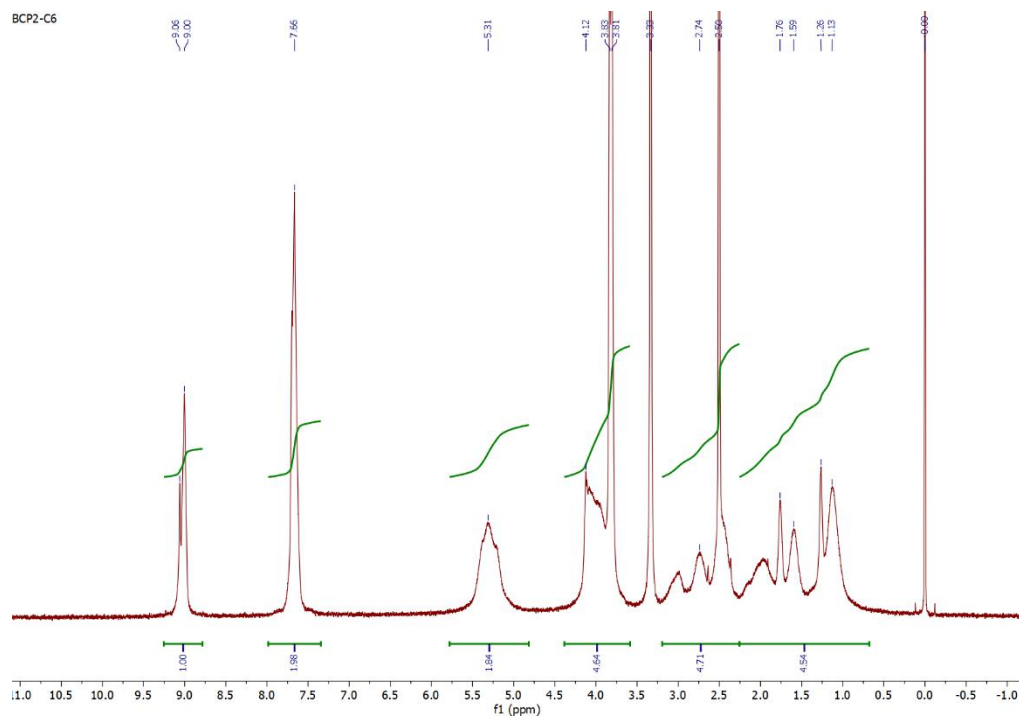

Figure S19.  $^1\text{H}$  NMR spectrum for BCP2-C<sub>6</sub>.

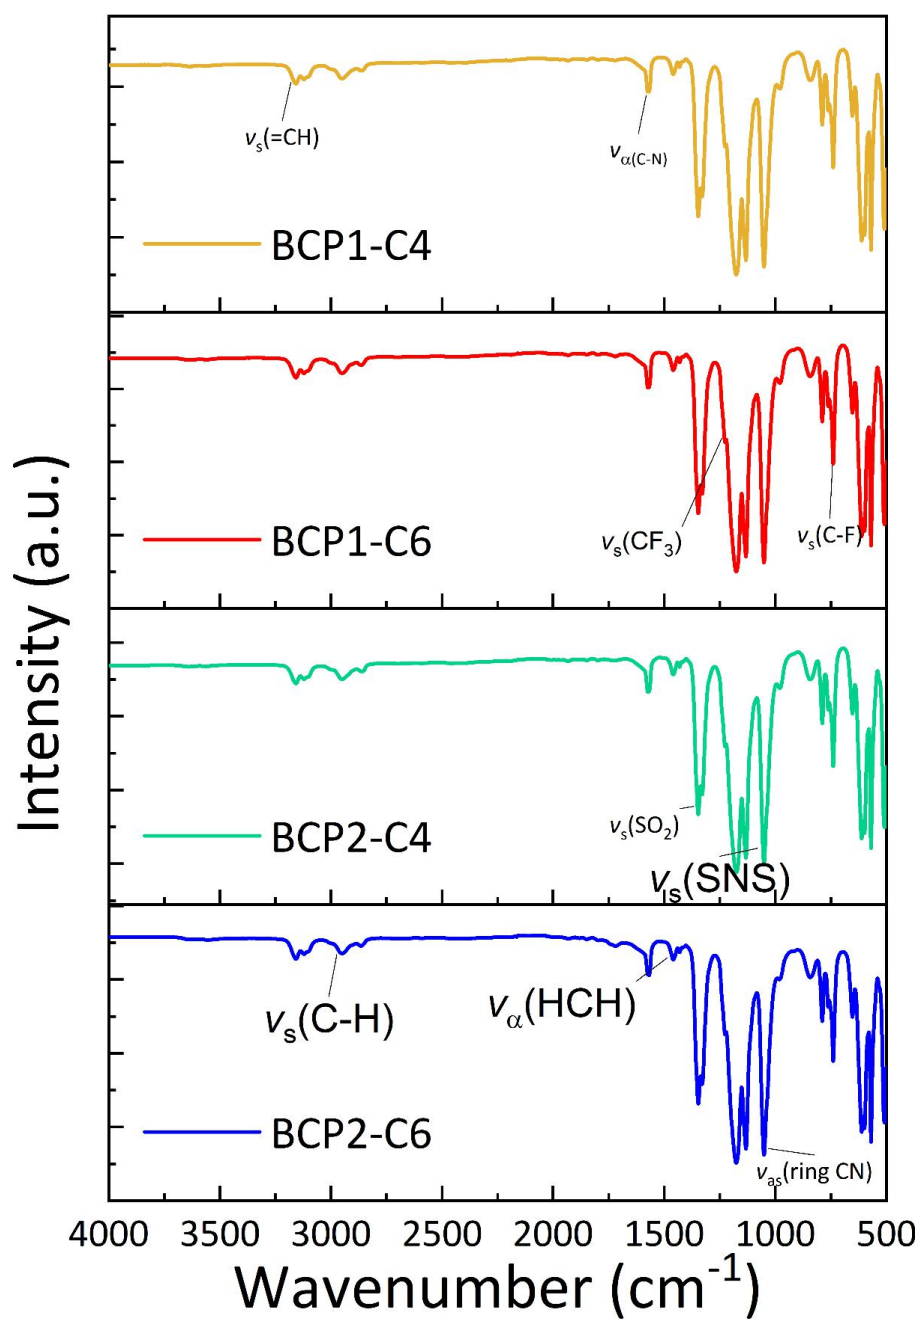

Figure S20. FT-IR data for BCPs.

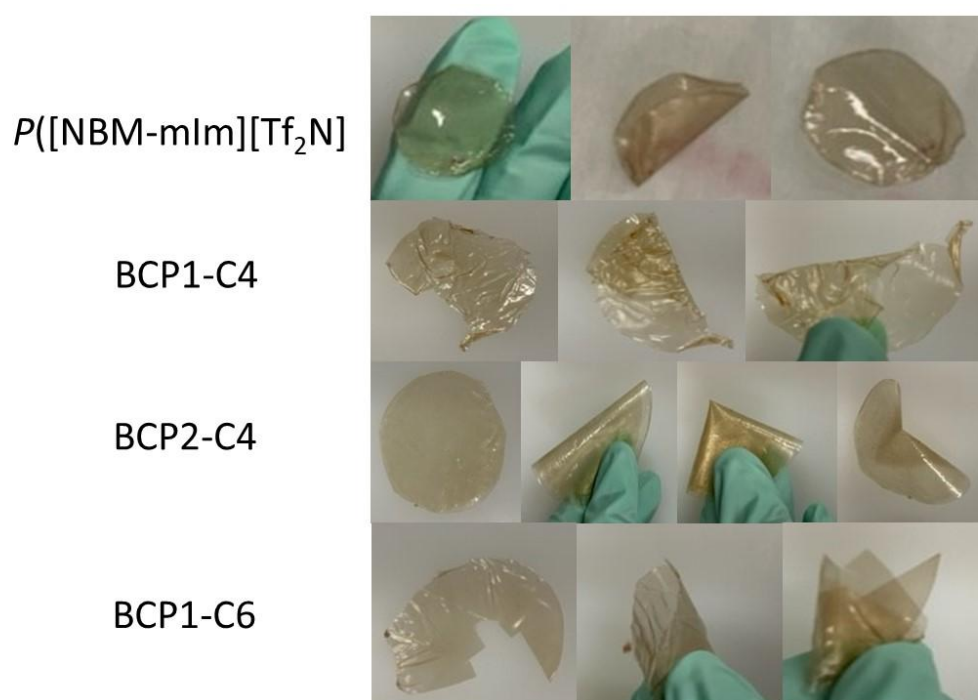

Figure S21. Flexibility of membranes.

Table S2. Pure gas diffusivity and solubility coefficients.

| ID                  | Diffusivity <sup>a,b</sup> |                  |                   |                  | Solubility <sup>a,c</sup> |                  |                   |                  |
|---------------------|----------------------------|------------------|-------------------|------------------|---------------------------|------------------|-------------------|------------------|
|                     | $D_{\text{CO}_2}$          | $D_{\text{N}_2}$ | $D_{\text{CH}_4}$ | $D_{\text{H}_2}$ | $S_{\text{CO}_2}$         | $S_{\text{N}_2}$ | $S_{\text{CH}_4}$ | $S_{\text{H}_2}$ |
| HM                  | $1.62 \pm 0.10$            | $0.39 \pm 0.08$  | $0.77 \pm 0.39$   | NA               | $40.3 \pm 4.77$           | $6.88 \pm 1.69$  | $2.37 \pm 1.08$   | NA               |
| BCP1-C <sub>4</sub> | $25.37 \pm 5.7$            | $2.42 \pm 0.40$  | $2.84 \pm 0.36$   | $15.37 \pm 2.51$ | $4.08 \pm 0.27$           | $2.09 \pm 0.62$  | $2.10 \pm 0.03$   | $3.76 \pm 0.50$  |
| BCP2-C <sub>4</sub> | $8.35 \pm 0.98$            | NA               | $6.71 \pm 1.99$   | $13.97 \pm 0.46$ | $9.23 \pm 0.01$           | NA               | $0.42 \pm 0.01$   | $3.55 \pm 0.38$  |
| BCP1-C <sub>6</sub> | $12.96 \pm 2.47$           | $4.08 \pm 1.66$  | $5.06 \pm 0.84$   | $28.21 \pm 5.57$ | $8.84 \pm 1.42$           | $1.02 \pm 0.74$  | $1.16 \pm 0.15$   | $2.05 \pm 0.63$  |
| BCP2-C <sub>6</sub> | $10.40 \pm 2.46$           | $1.45 \pm 0.42$  | $1.41 \pm 0.37$   | $9.81 \pm 2.64$  | $5.73 \pm 0.94$           | $1.33 \pm 0.89$  | $2.08 \pm 0.85$   | $3.64 \pm 0.43$  |

The diffusivity and solubility coefficients were measured at 2 atm and 20 °C. <sup>a</sup>Measurements are performed in triplicates. <sup>b</sup>Diffusivity coefficient ( $10^{-9}$  cm<sup>2</sup>/s). <sup>c</sup>Solubility coefficient ( $10^{-2}$  cm<sup>3</sup><sub>(STP)</sub> cm<sup>-3</sup> cmHg<sup>-1</sup>).
